# Supplementary material for: Efficient (Z)-selective semihydrogenation of alkynes catalyzed by air-stable imidazolyl amino molybdenum cluster sulfides
Source: Royal Society of Chemistry journal article supplement (doi:10.1039/d2qi02755k), 2023-01-01
Supplement: d2qi02755k1.pdf [file d2qi02755k1.pdf]

## Supporting Information

# Efficient (Z)-selective semihydrogenation of alkynes catalyzed by air-stable imidazolyl amino molybdenum cluster sulfides

*María Gutiérrez-Blanco,<sup>a</sup> Eva Guillamón,<sup>a</sup> Vicent S. Safont,<sup>a</sup> Andrés G. Algarra,<sup>b</sup> M. Jesús Fernández-Trujillo,<sup>b</sup> Kathrin Junge,<sup>c</sup> Manuel G. Basallote,<sup>\*b</sup> Rosa Llusar,<sup>\*a</sup> and Matthias Beller<sup>\*c</sup>*

<sup>a</sup> Departament de Química Física i Analítica, Universitat Jaume I. Av. Sos Baynat s/n, 12071 Castelló, Spain

<sup>b</sup> Departamento de Ciencia de los Materiales e Ingeniería Metalúrgica y Química Inorgánica, Instituto de Biomoléculas (INBIO), Facultad de Ciencias, Universidad de Cádiz, Apartado 40, Puerto Real, 11510 Cádiz, Spain.

<sup>c</sup> Leibniz-Institute for Catalysis, Albert-Einstein-Street 29a, 18059 Rostock, Germany

### Table of contents

|                                                                                                                                   |     |
|-----------------------------------------------------------------------------------------------------------------------------------|-----|
| 1. Catalysts characterization.....                                                                                                | S1  |
| 2. Mo <sub>3</sub> S <sub>4</sub> cluster reactivity towards diphenylacetylene.....                                               | S4  |
| 3. Conditions optimization for the semihydrogenation of diphenylacetylene (1a) to cis-stilbene (2a) .....                         | S5  |
| 4. Cluster monitoring during catalysis .....                                                                                      | S6  |
| 5. Mechanism control experiments .....                                                                                            | S7  |
| 6. Characterization data of isolated alkenes prepared from diphenylacetylene derivatives .....                                    | S8  |
| 7. <sup>1</sup> H NMR and <sup>13</sup> C NMR spectra of isolated products .....                                                  | S10 |
| 8. Conditions optimization for the semihydrogenation of 3,7,11,15- tetramethylhexadec-1-yn-3-ol (2a) and reaction monitoring..... | S19 |
| 9. References .....                                                                                                               | S20 |

# 1. Catalysts characterization

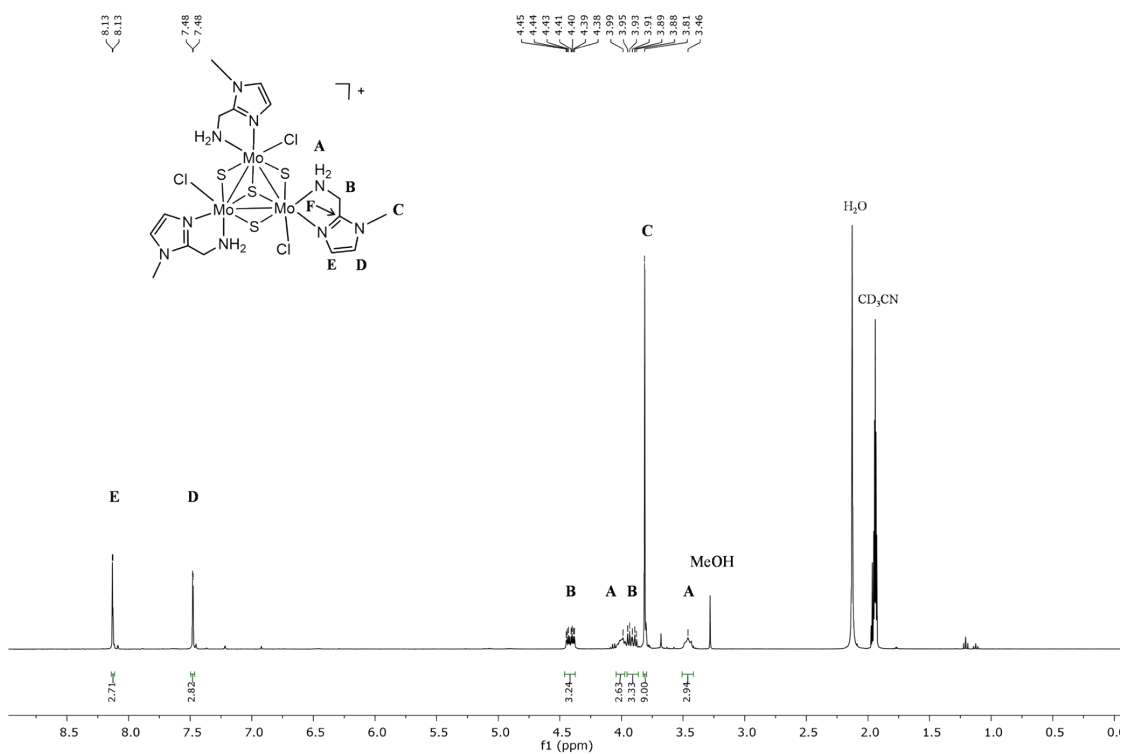

Figure S11.  $^1\text{H}$  NMR (400 MHz,  $\text{CD}_3\text{CN}$ , 298 K) spectrum of the  $[\mathbf{1}]\text{BF}_4$  complex

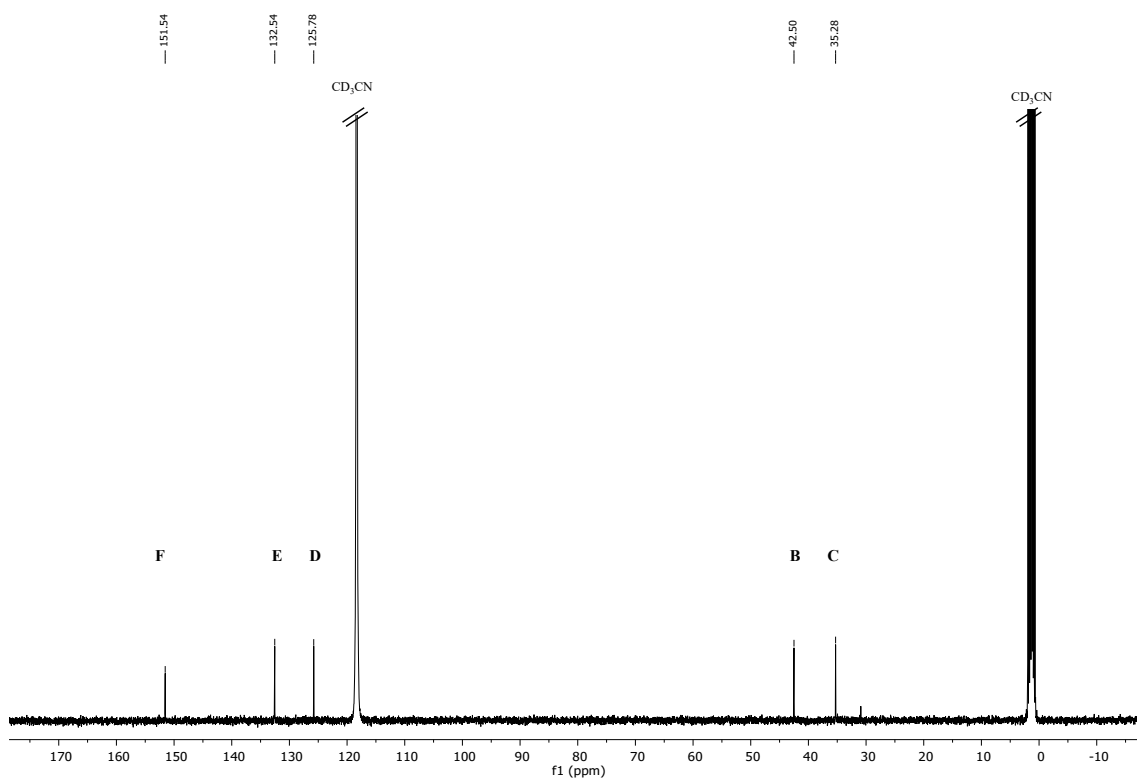

Figure S12.  $^{13}\text{C}$  NMR (101MHz,  $\text{CD}_3\text{CN}$ , 298 K) spectrum of the  $[\mathbf{1}]\text{BF}_4$  complex.

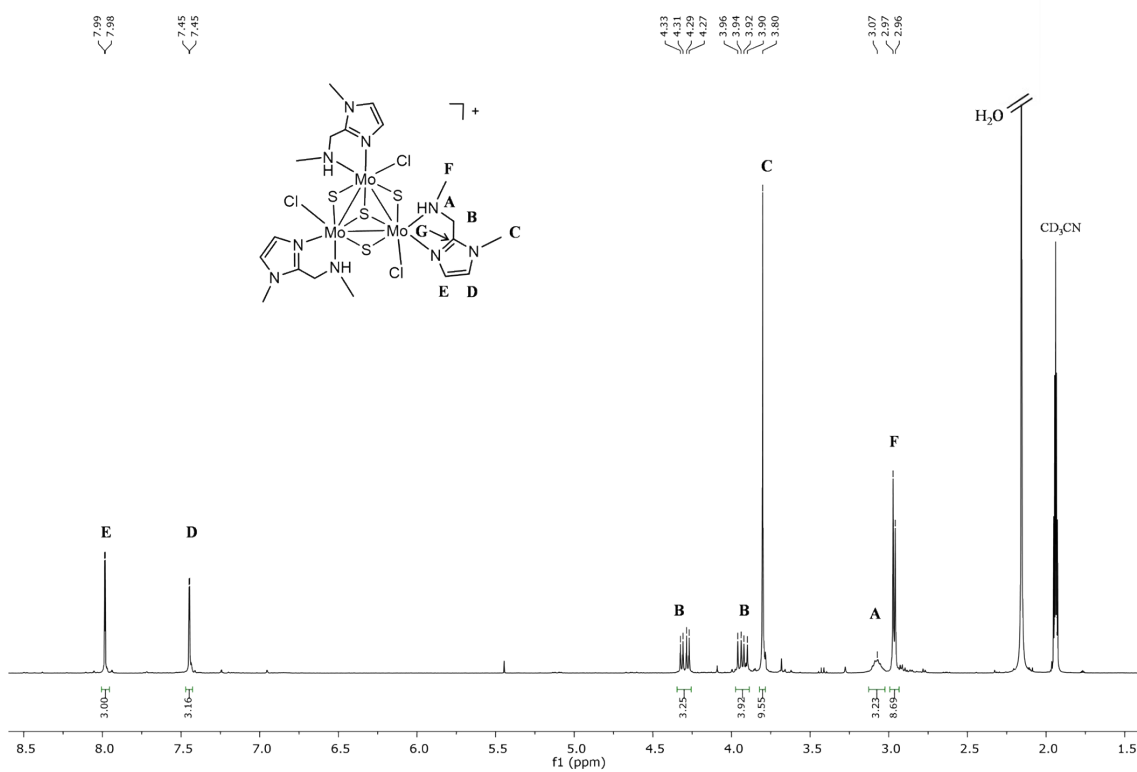

**Figure SI3.** <sup>1</sup>H NMR (400 MHz, CD<sub>3</sub>CN, 298 K) spectrum of the [2]BF<sub>4</sub> complex.

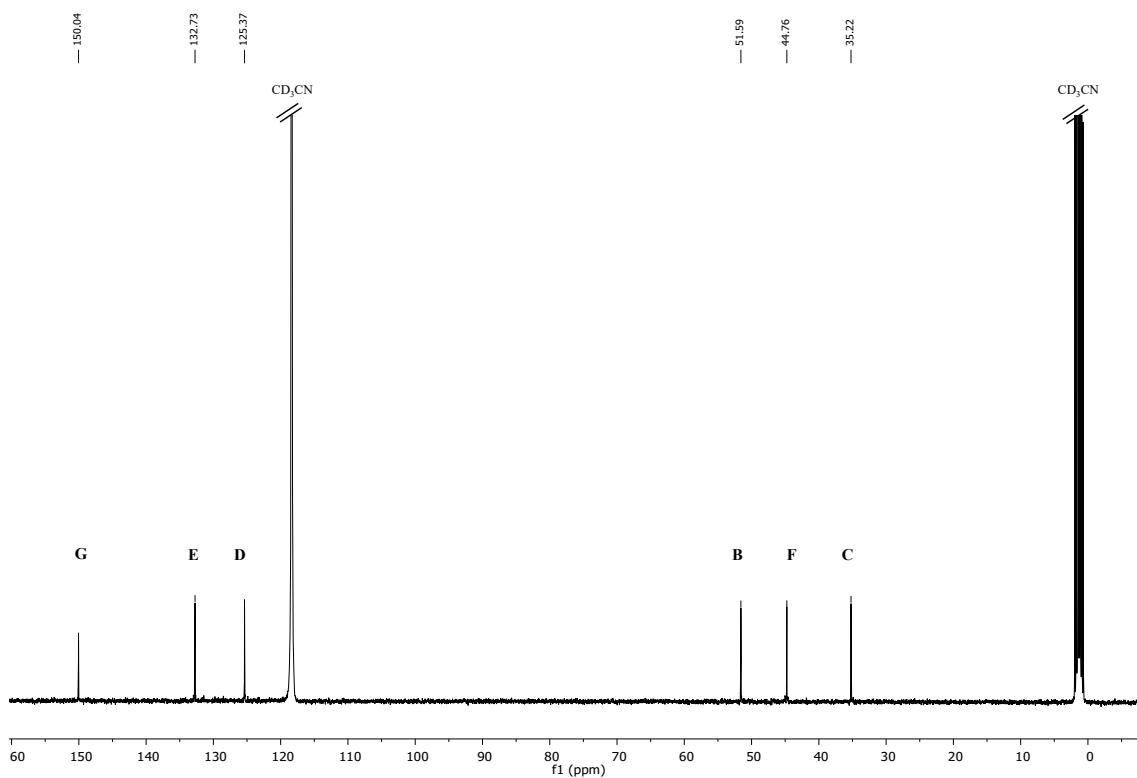

**Figure SI4.** <sup>13</sup>C NMR (101 MHz, CD<sub>3</sub>CN, 298 K) spectrum of the [2]BF<sub>4</sub> complex.

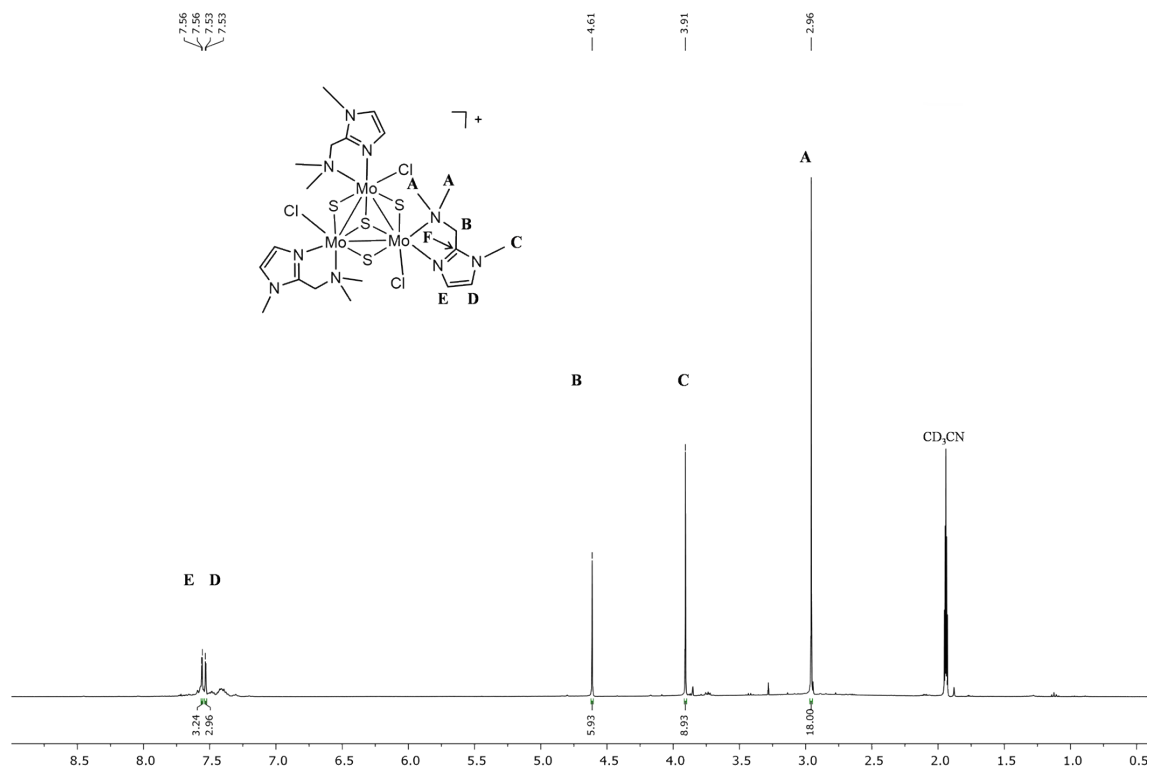

**Figure SI5.** <sup>1</sup>H NMR (400 MHz, CD<sub>3</sub>CN, 298 K) spectrum of the [3]BF<sub>4</sub> complex.

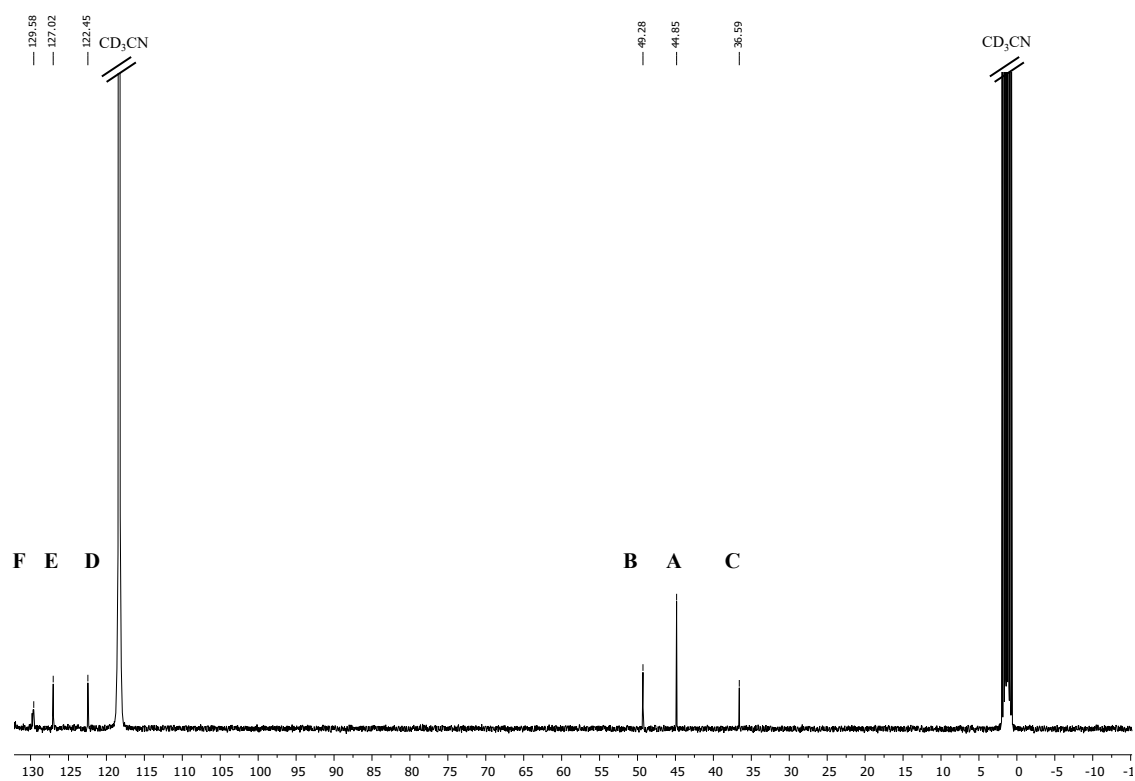

**Figure SI6.** <sup>13</sup>C NMR (101 MHz, CD<sub>3</sub>CN, 298 K) spectrum of the [3]BF<sub>4</sub> complex.

## 2. Mo<sub>3</sub>S<sub>4</sub> cluster reactivity towards diphenylacetylene (dpa)

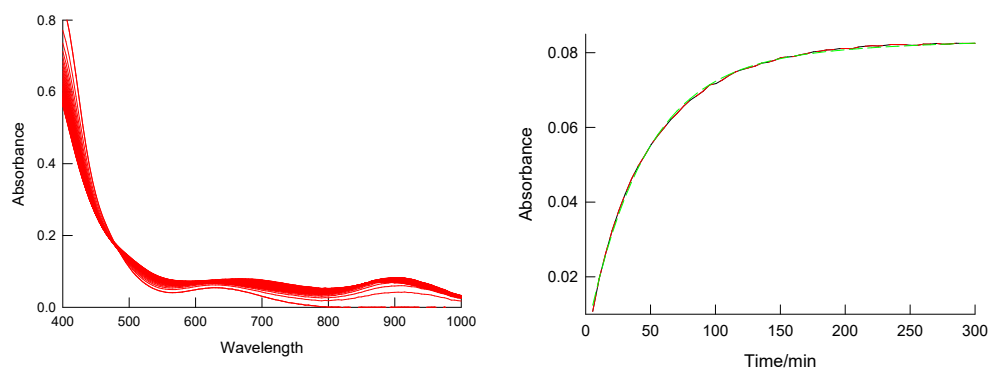

**Figure SI7.** Left: typical spectral changes in UV-Vis spectrum of [Mo<sub>3</sub>S<sub>4</sub>Cl<sub>3</sub>(ImNH<sub>2</sub>)<sub>3</sub>]<sup>+</sup> (1<sup>+</sup>) upon reaction with an excess of dpa ([1<sup>+</sup>]= 2.5 × 10<sup>-4</sup> M, [dpa]= 0.042 M, acetonitrile solution at 25.0°C). Right: trace at 900 nm: red (experimental) and green (fit to a single exponential).

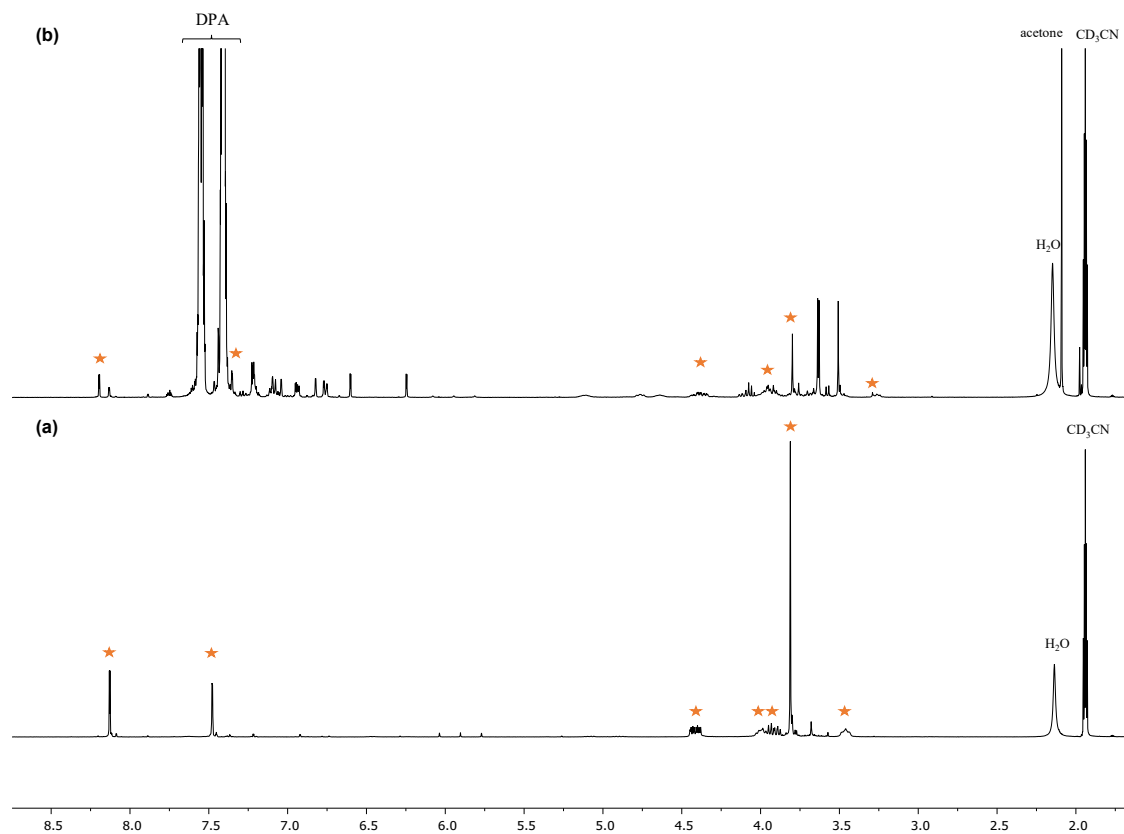

**Figure SI8.** <sup>1</sup>H NMR (400 MHz, CD<sub>3</sub>CN, 298 K) spectra of complex 1<sup>+</sup> (a) and complex 1<sup>+</sup> with an excess of diphenylacetylene (20 equiv.) after 18 h of reaction (b). Signals marked with a star in both spectra correspond to the 1<sup>+</sup> cluster.

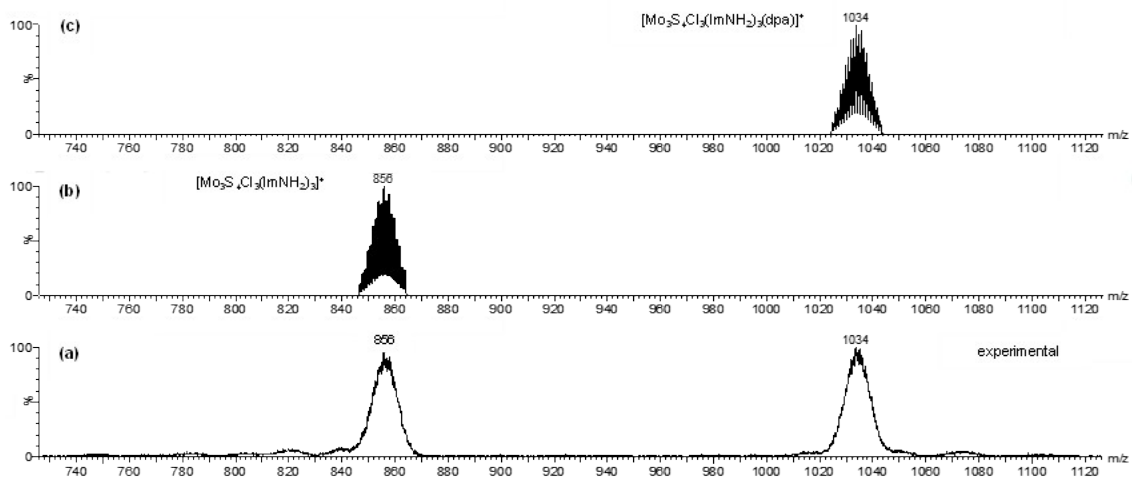

**Figure S19.** ESI-MS spectrum of a solution 1 M of  $[\text{Mo}_3\text{S}_4\text{Cl}_3(\text{ImNH}_2)_3]^+$  ( $\mathbf{1}^+$ ) in acetonitrile after addition of a 20 molar excess of dpa (a) together with the simulated spectra of  $\mathbf{1}^+$ (b) and  $[\mathbf{1} + \text{dpa}]^+$  (c). The experiment was recorded at 20 V.

### 3. Conditions optimization for the semihydrogenation of diphenylacetylene (**1a**) to cis-stilbene (**2a**)

**Table S11.** Influence of the pressure and temperature on the catalytic reduction of **1a** to **2a**.<sup>[a]</sup>

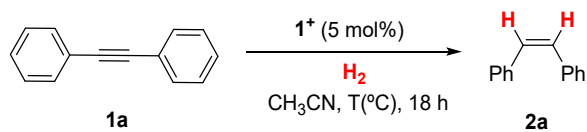

| Entry | T (°C) | H <sub>2</sub> (bar) | Conversion <sup>[b]</sup> (%) | Yield <b>2a</b> <sup>[b]</sup> (%) |
|-------|--------|----------------------|-------------------------------|------------------------------------|
| 1     | 150    | -                    | 0                             | 0                                  |
| 2     | 150    | 50                   | >99                           | 99                                 |
| 3     | 100    | 50                   | >99                           | 99                                 |
| 4     | 100    | 30                   | >99                           | 99                                 |
| 5     | 100    | 20                   | >99                           | 99                                 |
| 6     | 70     | 20                   | >99                           | 99                                 |
| 7     | 70     | 10                   | 16                            | 16                                 |
| 8     | 60     | 20                   | 80                            | 79                                 |
| 9     | 50     | 20                   | 42                            | 42                                 |

<sup>[a]</sup> Reaction conditions: diphenylacetylene (0.1 mmol), catalyst (5 mol%), 18 h. <sup>[b]</sup> Determined by GC analysis using n-hexadecane as an internal standard.

**Table SI2.** Influence of the solvent on the catalytic reduction of **1a** to **2a**.<sup>[a]</sup>

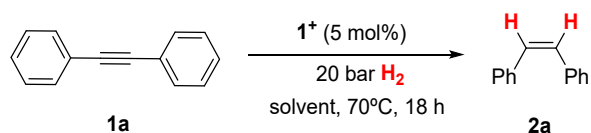

| Entry | Solvent               | Conversion <sup>[b]</sup> (%) | Yield <b>2a</b> <sup>[b]</sup> (%) |
|-------|-----------------------|-------------------------------|------------------------------------|
| 1     | CH <sub>3</sub> CN    | >99                           | 99                                 |
| 2     | CH <sub>3</sub> OH    | >99                           | 99                                 |
| 3     | 2-Fluoroethanol       | n.r                           | -                                  |
| 4     | Hexafluoroisopropanol | n.r                           | -                                  |
| 5     | THF                   | 90                            | 90                                 |

<sup>[a]</sup> Reaction conditions: diphenylacetylene (0.1 mmol), H<sub>2</sub> (20 bar), catalyst (5 mol%), 18 h, 70 °C. <sup>[b]</sup> Determined by GC analysis using n-hexadecane as an internal standard.

## 4. Cluster monitoring during catalysis

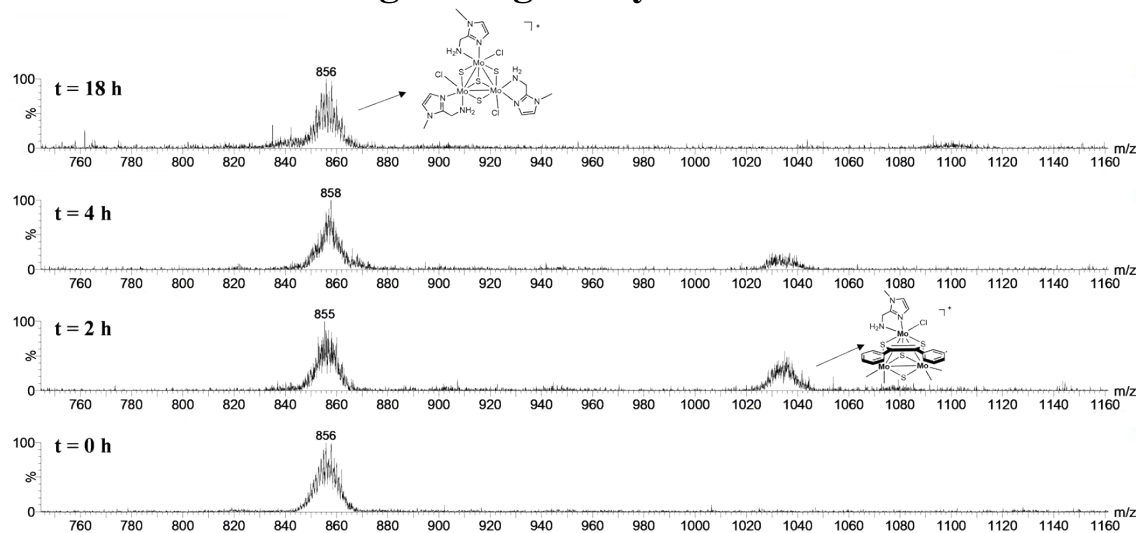

**Figure SI10.** ESI-MS spectra for the dpa semihydrogenation reaction monitoring at  $t = 0$  (a),  $t = 2$  h (b),  $t = 4$  h (c) and  $t = 18$  h (d). All the experiments were recorded at 20 V.

## 5. Mechanism control experiments

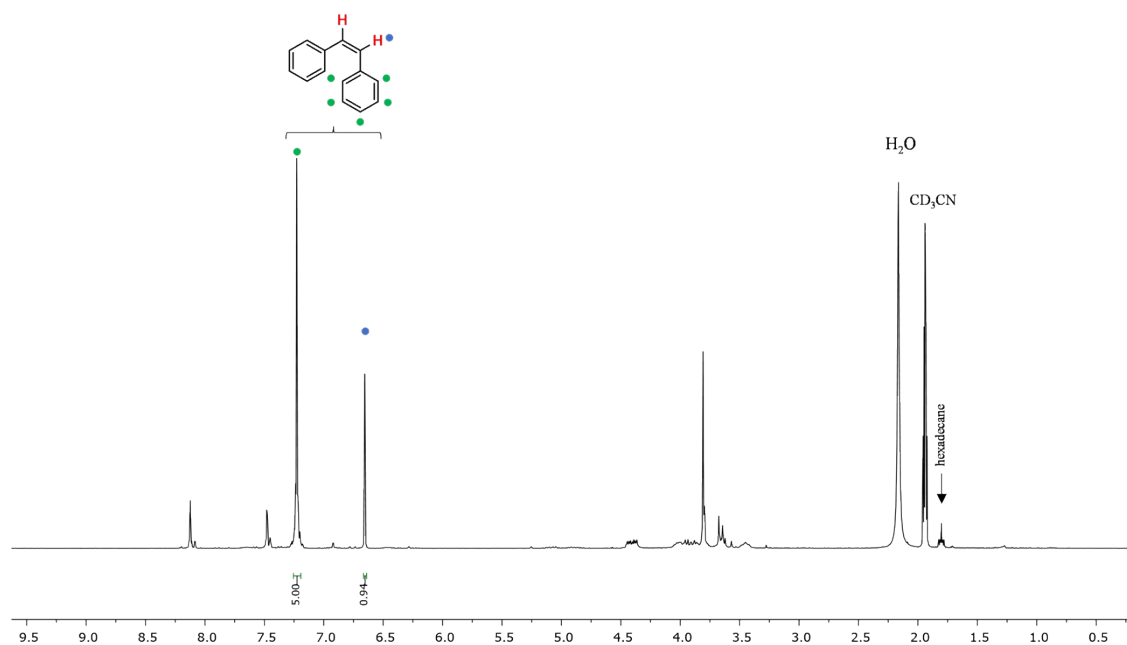

**Figure SI11.**  $^1\text{H}$  NMR (400 MHz,  $\text{CD}_3\text{CN}$ , 298 K) spectrum of the catalytic reaction mixture (diphenylacetylene and the  $[\text{Mo}_3\text{S}_4\text{Cl}_3(\text{ImND}_2)_3]^+$  complex) at  $70^\circ\text{C}$  and 20 bar  $\text{H}_2$  after 18 hours of reaction.

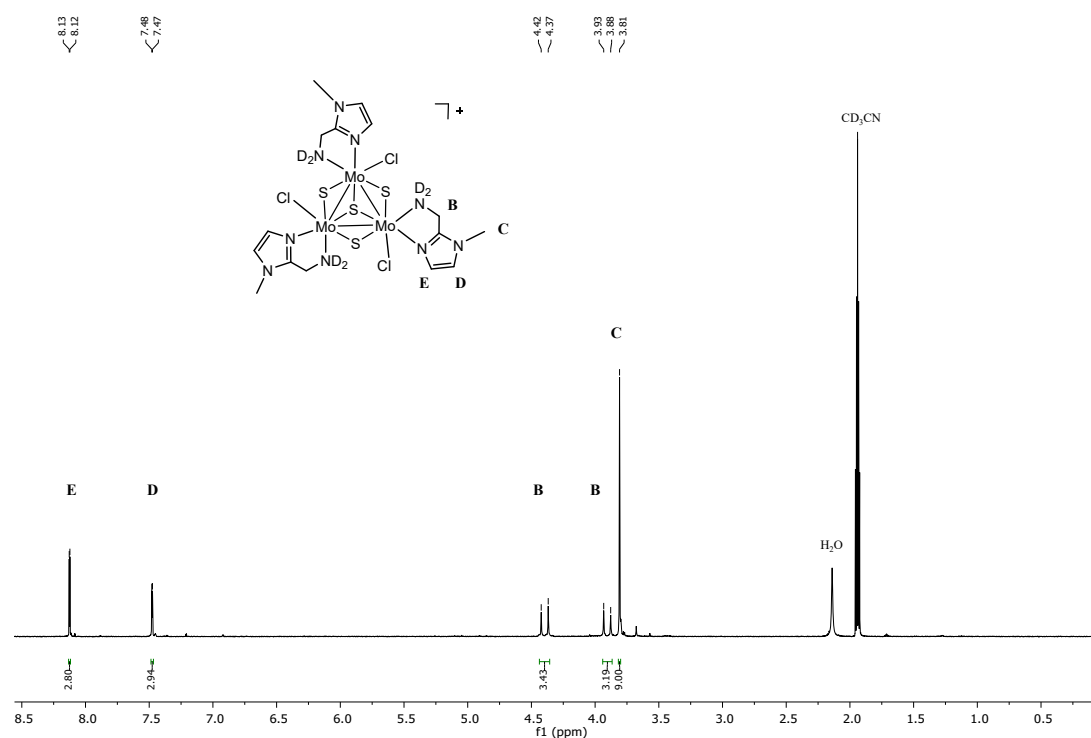

**Figure SI12.**  $^1\text{H}$  NMR (300 MHz,  $\text{CD}_3\text{CN}$ , 298 K) spectrum of the  $[\text{Mo}_3\text{S}_4\text{Cl}_3(\text{ImND}_2)_3]\text{PF}_6$  complex.



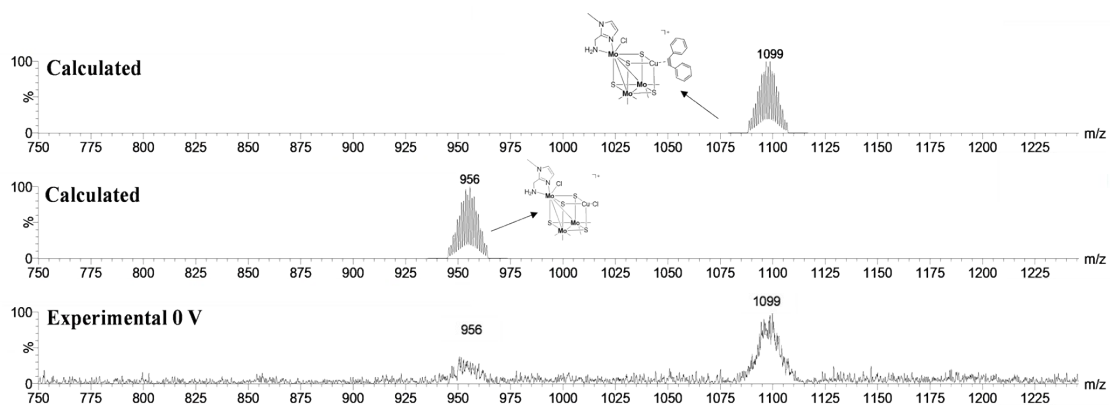

**Figure SI13.** ESI spectrum of the catalytic reaction mixture (diphenylacetylene, the  $[\text{Mo}_3\text{S}_4\text{Cl}_3(\text{ImNH}_2)_3]^+$  complex and  $\text{CuCl}$ ) at  $70^\circ\text{C}$  and 20 bar  $\text{H}_2$  after 18 hours of reaction. The experiment was recorded at 0 V.

## 6. Characterization data of isolated alkenes prepared from diphenylacetylene derivatives

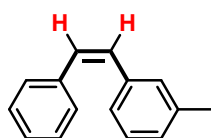

**(Z)-1-methyl-2-styrylbenzene**<sup>1</sup> 51 mg. 90 %. colorless oil (pentane) <sup>1</sup>H NMR (300 MHz,  $\text{CDCl}_3$ )  $\delta$  7.28 – 7.19 (m, 5H), 7.14 – 7.01 (m, 4H), 6.58 (s, 2H), 2.27 (s, 3H); <sup>13</sup>C NMR (101 MHz,  $\text{CDCl}_3$ )  $\delta$  137.91, 137.49, 137.35, 130.52, 130.22, 129.74, 129.02, 128.29, 128.21, 127.98, 127.18, 126.01, 21.47.

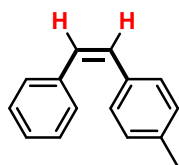

**(Z)-1-methyl-4-styrylbenzene**<sup>1</sup> 26.6 mg. yield 46 %. colorless oil (pentane) <sup>1</sup>H NMR (300 MHz,  $\text{CDCl}_3$ )  $\delta$  7.30 – 7.19 (m, 5H), 7.18 – 7.14 (m, 2H), 7.04 (d, 2H), 6.55 (s, 2H), 2.32 (s, 3H); <sup>13</sup>C NMR (75 MHz,  $\text{CDCl}_3$ )  $\delta$  137.62, 136.99, 134.39, 130.33, 129.68, 129.04, 128.97, 128.92, 128.32, 127.10, 21.37.

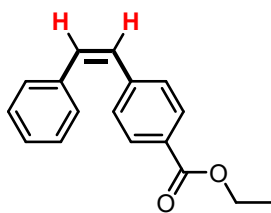

**Ethyl-(Z)-4-styrylbenzoate**<sup>1</sup> 62 mg. 81 %. colorless liquid (pentane) <sup>1</sup>H NMR (300 MHz,  $\text{CDCl}_3$ )  $\delta$  7.89 (m, 2H), 7.29 (m, 2H), 7.23 (m, 5 H), 6.66 (q, 2H), 4.36 (q, 2 H), 1.38 (s, 3H); <sup>13</sup>C NMR (75 MHz,  $\text{CDCl}_3$ )  $\delta$  166.57, 142.10, 136.82, 132.29, 129.61, 129.39, 128.99, 128.95, 128.47, 127.62, 61.02, 14.46.

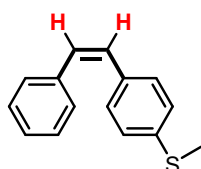

**(Z)-methyl(4-styrylphenyl)sulfane**<sup>1</sup> 60 mg. 89 %. white solid (pentane) <sup>1</sup>H NMR (300 MHz,  $\text{CDCl}_3$ )  $\delta$  7.43-7.32 (m, 4 H), 7.24 – 7.29 (m, 2 H), 7.16 – 7.14 (m, 3H), 6.97 (s, 2H), 2.41 (s, 3H); <sup>13</sup>C NMR (75 MHz,  $\text{CDCl}_3$ )  $\delta$  137.98, 137.44, 134.40, 128.81, 128.19, 128.15, 127.68, 127.02, 126.81, 126.56, 15.93.

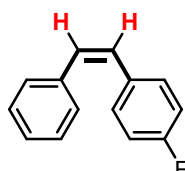

**(Z)-1-fluoro-4-styrylbenzene**<sup>1</sup> 50 mg. 86 %. colorless liquid (pentane) <sup>1</sup>H NMR (400 MHz,  $\text{CDCl}_3$ )  $\delta$  7.30 – 7.21 (m, 6H), 6.94 (t,  $J$  = 8.8 Hz, 1H),

6.63 (d,  $J = 12.2$  Hz, 1H), 6.58 (d,  $J = 12.2$  Hz, 1H);  $^{13}\text{C}$  NMR (101 MHz,  $\text{CDCl}_3$ )  $\delta$  163.21, 160.76, 137.20, 133.33, 130.71, 130.63, 130.41, 129.23, 128.97, 128.45, 127.34, 115.39, 115.18.

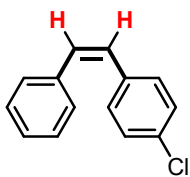

**(Z)-1-chloro-4-styrylbenzene**<sup>1</sup> 41.4 mg. 65 %. colorless liquid (pentane)  $^1\text{H}$  NMR (400 MHz,  $\text{CDCl}_3$ )  $\delta$  7.25-7.14 (m, 9 H), 6.63 (d, 12.2 Hz, 1H), 6.53 (d, 12.2 Hz, 1H);  $^{13}\text{C}$  NMR (101 MHz,  $\text{CDCl}_3$ )  $\delta$  136.72, 135.50, 132.60, 130.80, 130.05, 128.76, 128.64, 128.24, 128.17, 127.15.

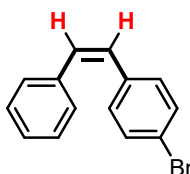

**(Z)-1-bromo-4-styrylbenzene**<sup>1</sup> 53.9 mg. 70 %. colorless liquid (pentane)  $^1\text{H}$  NMR (400 MHz,  $\text{CDCl}_3$ )  $\delta$  7.37 – 7.32 (m, 2H), 7.25 – 7.19 (m, 5H), 7.14 – 7.08 (m, 2H), 6.64 (d,  $J = 12.2$  Hz, 1H), 6.51 (d,  $J = 12.2$  Hz, 1H);  $^{13}\text{C}$  NMR (101 MHz,  $\text{CDCl}_3$ )  $\delta$  137.01, 136.28, 131.52, 131.20, 130.69, 129.10, 128.94, 128.50, 127.49, 121.09.

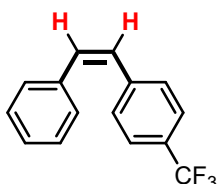

**(Z)-1-styryl-4-(trifluoromethyl)benzene**<sup>1</sup> 58 mg. 78 %. colorless liquid (pentane)  $^1\text{H}$  NMR (400 MHz,  $\text{CDCl}_3$ )  $\delta$  7.47 (d,  $J = 8.2$  Hz, 3H), 7.34 (d,  $J = 8.1$  Hz, 3H), 7.28 – 7.19 (m, 5H), 6.73 (d,  $J = 12.2$  Hz, 1H), 6.60 (d,  $J = 12.2$  Hz, 1H).  $^{13}\text{C}$  NMR (101 MHz,  $\text{CDCl}_3$ )  $\delta$  141.08, 136.72, 132.49, 129.29, 128.97, 128.90, 128.57, 127.72, 125.36, 125.32, 125.28, 125.24.

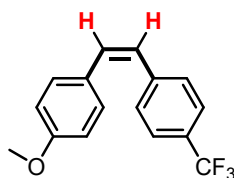

**(Z)-1-methoxy-4-(4-(trifluoromethyl)styryl)benzene**<sup>2</sup> 45 mg. 55 %. colorless liquid (pentane)  $^1\text{H}$  NMR (400 MHz,  $\text{CDCl}_3$ )  $\delta$  7.48 (d,  $J = 8.2$  Hz, 2H), 7.37 (d,  $J = 8.5$  Hz, 2H), 7.16 (d,  $J = 8.4$  Hz, 1H), 6.78 (d, 2H), 6.65 (d,  $J = 12.2$  Hz, 1H), 6.50 (d,  $J = 12.2$  Hz, 1H);  $^{13}\text{C}$  NMR (101 MHz,  $\text{CDCl}_3$ )  $\delta$  159.23, 141.51, 131.98, 130.32, 129.22, 129.09, 128.77, 127.37, 125.3, 123.02, (q,  $J = 3.8$  Hz), 113.96, 55.36.

## 7. $^1\text{H}$ NMR and $^{13}\text{C}$ NMR spectra of isolated products

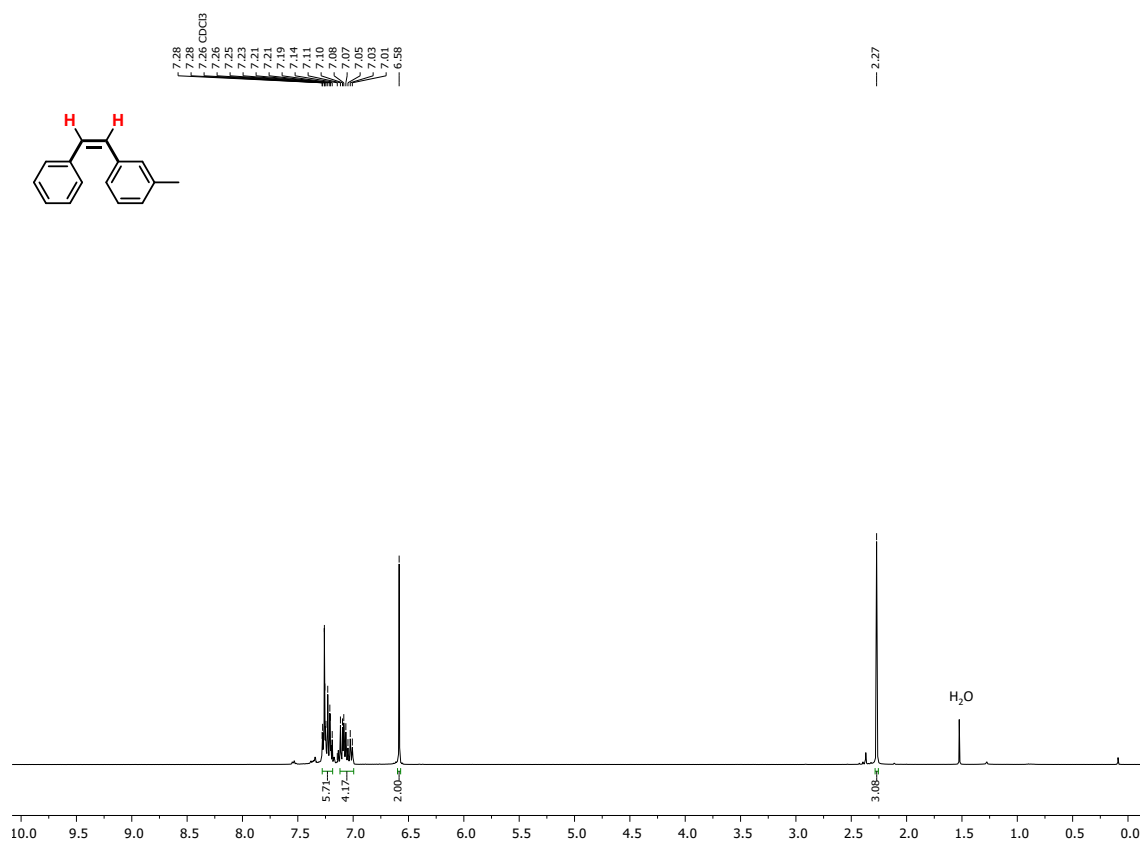

**Figure SI14.**  $^1\text{H}$  NMR (300 MHz,  $\text{CDCl}_3$ , 298 K) spectrum of (*Z*)-1-methyl-2-styrylbenzene.

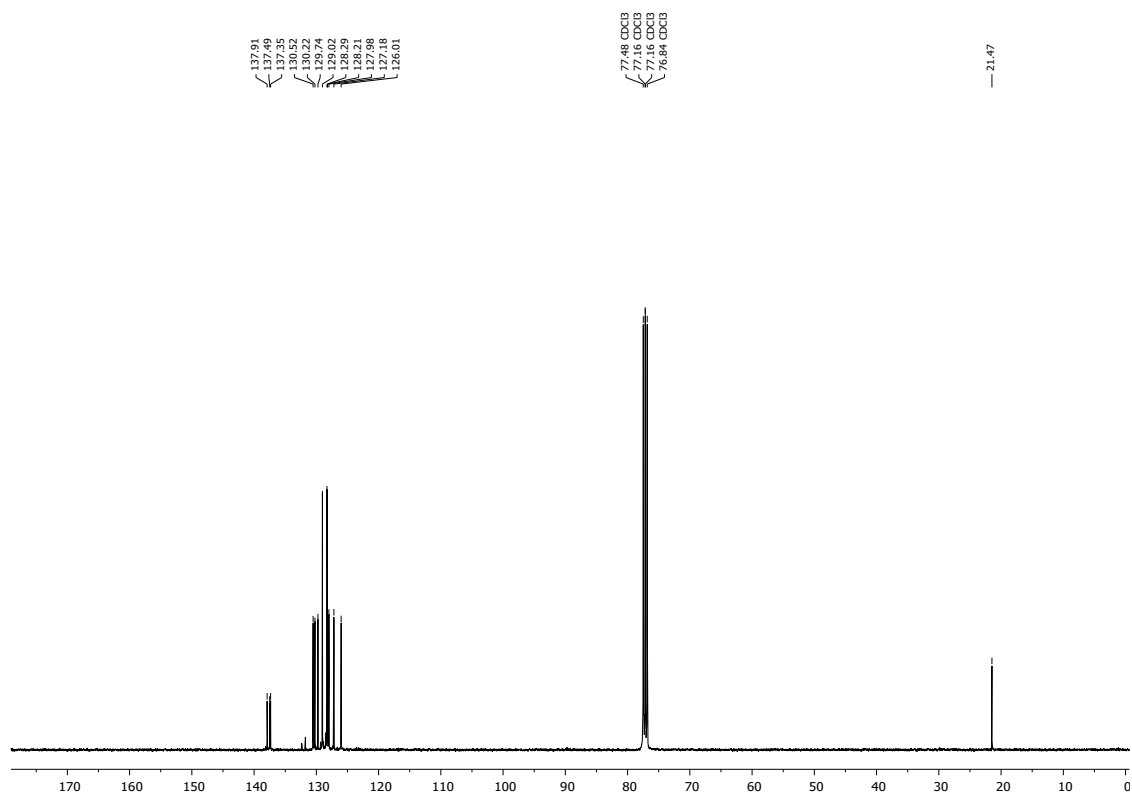

**Figure SI15.**  $^{13}\text{C}$  NMR (75 MHz,  $\text{CDCl}_3$ , 298 K) spectrum of (*Z*)-1-methyl-2-styrylbenzene.

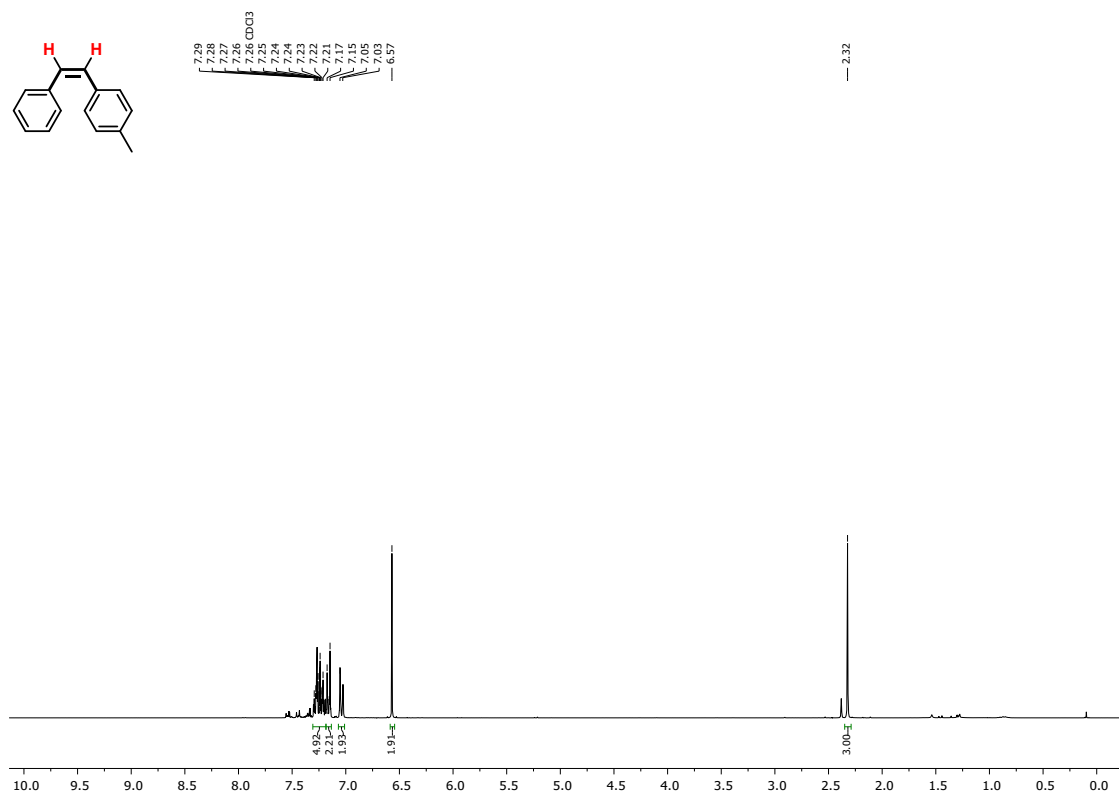

**Figure SI16.** <sup>1</sup>H NMR (300 MHz, CDCl<sub>3</sub>, 298 K) spectrum of (Z)-1-methyl-4-styrylbenzene.

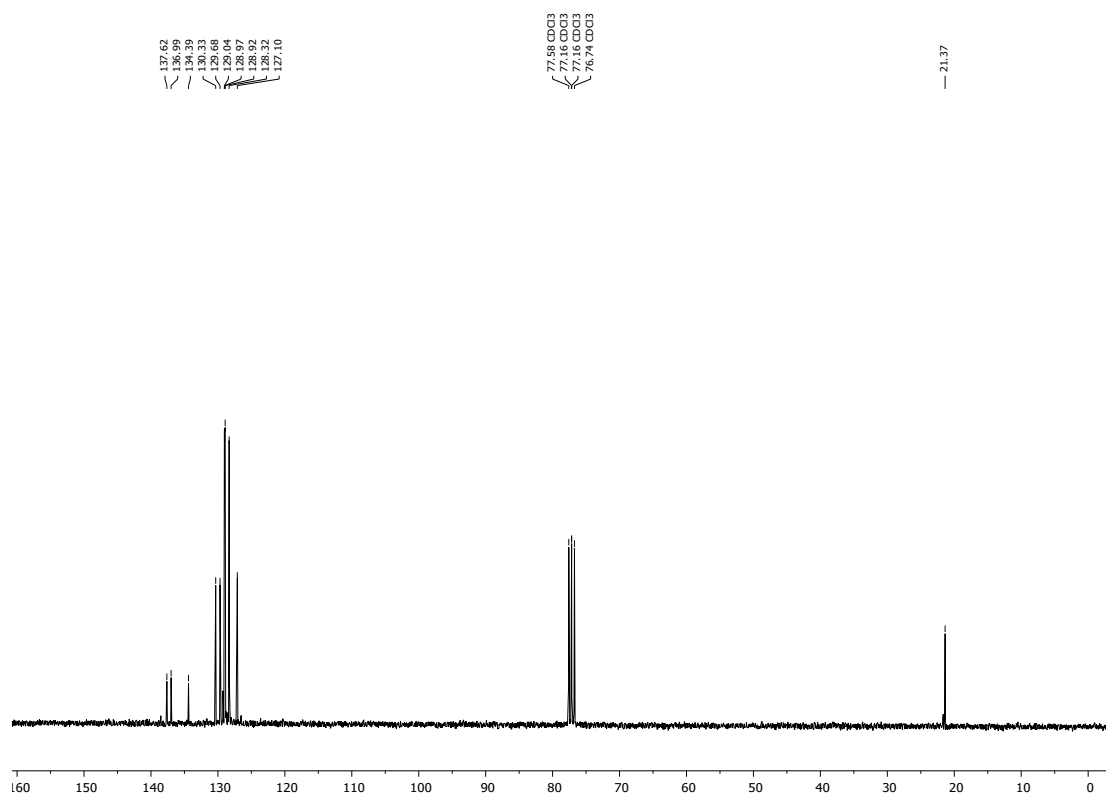

**Figure SI17.** <sup>13</sup>C NMR (75 MHz, CDCl<sub>3</sub>, 298 K) spectrum of (Z)-1-methyl-4-styrylbenzene.

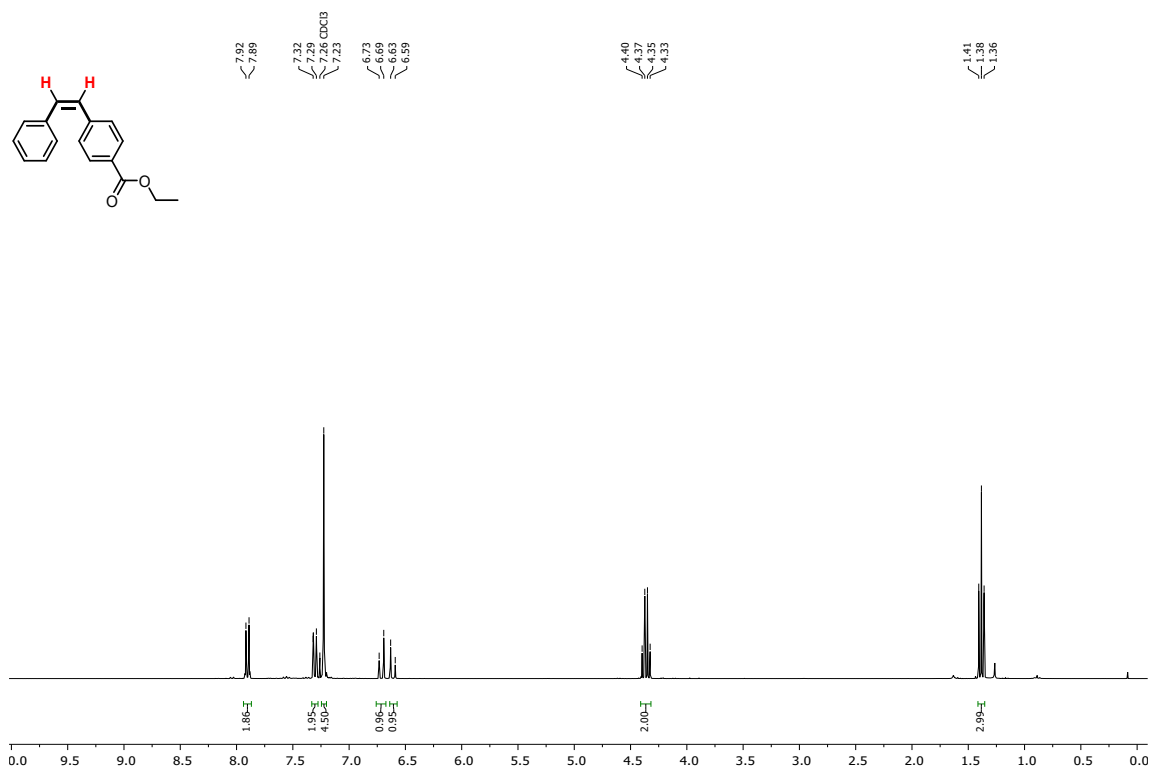

**Figure SI18.** <sup>1</sup>H NMR (300 MHz, CDCl<sub>3</sub>, 298 K) spectrum of ethyl-(*Z*)-4-styrylbenzoate.

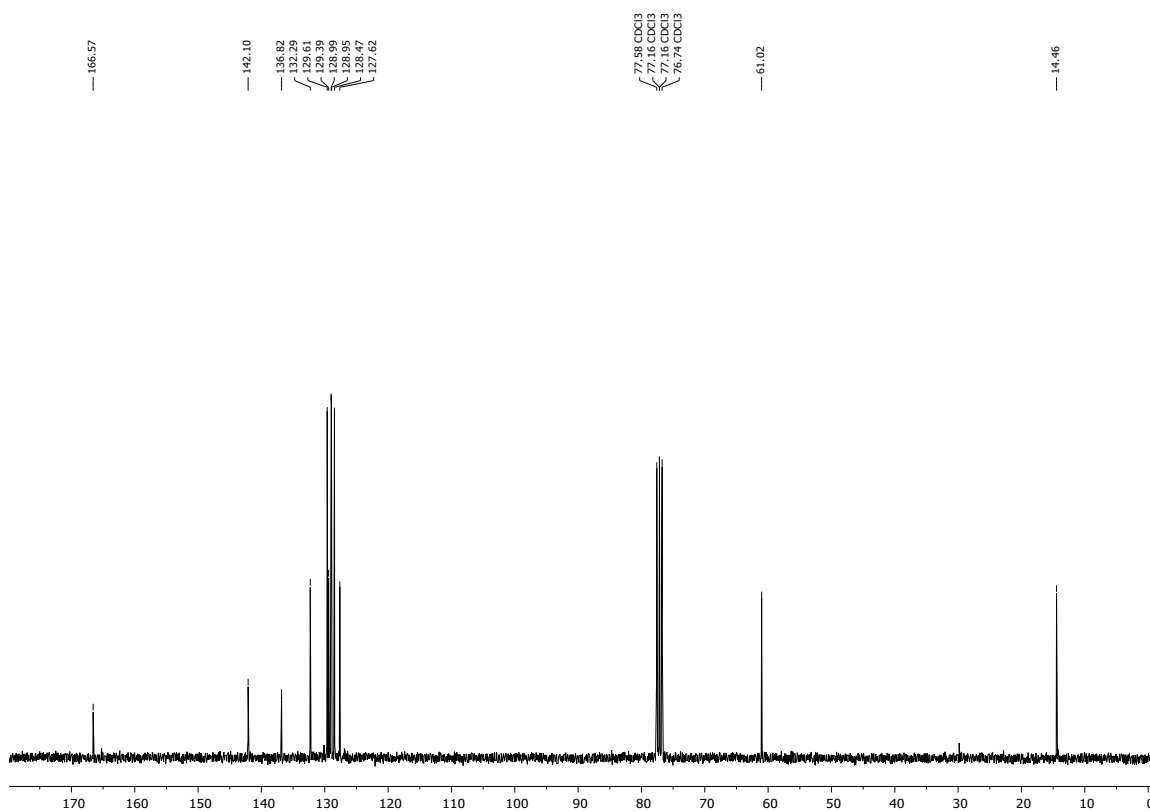

**Figure SI19.** <sup>13</sup>C NMR (75 MHz, CDCl<sub>3</sub>, 298 K) spectrum of ethyl-(*Z*)-4-styrylbenzoate.

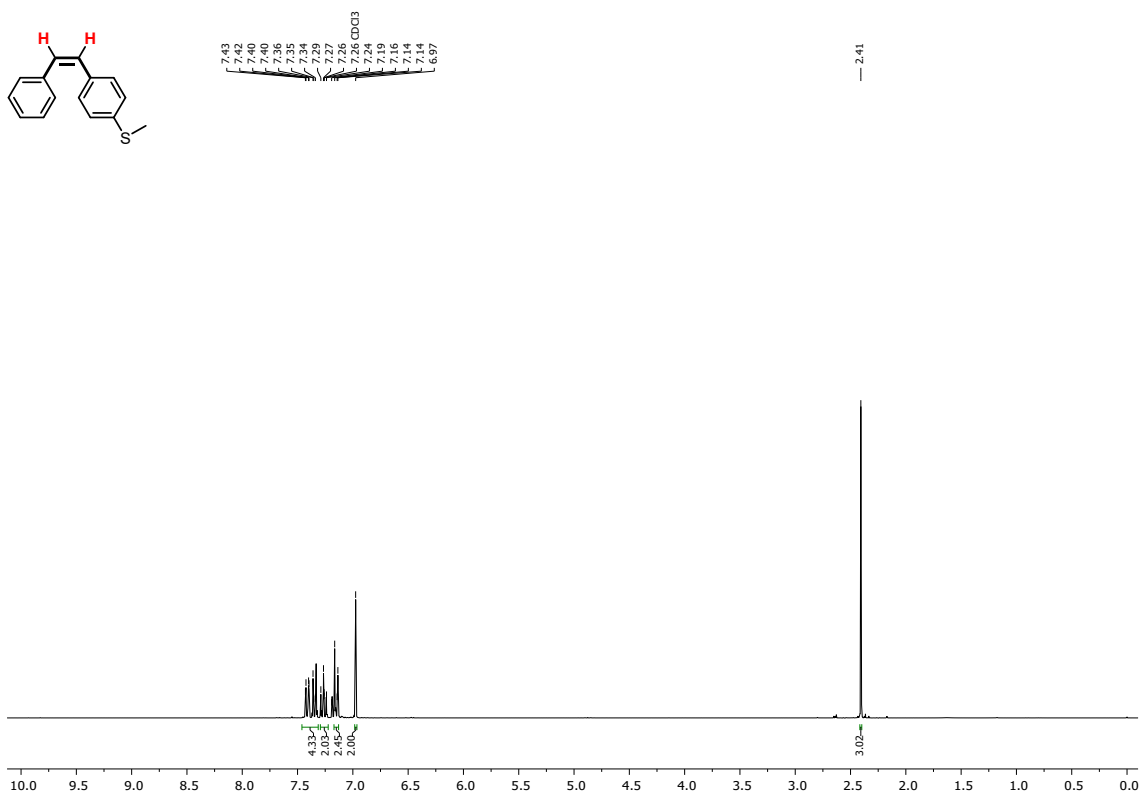

**Figure SI20.** <sup>1</sup>H NMR (300 MHz, CDCl<sub>3</sub>, 298 K) spectrum of (Z)-methyl(4-styrylphenyl)sulfane.

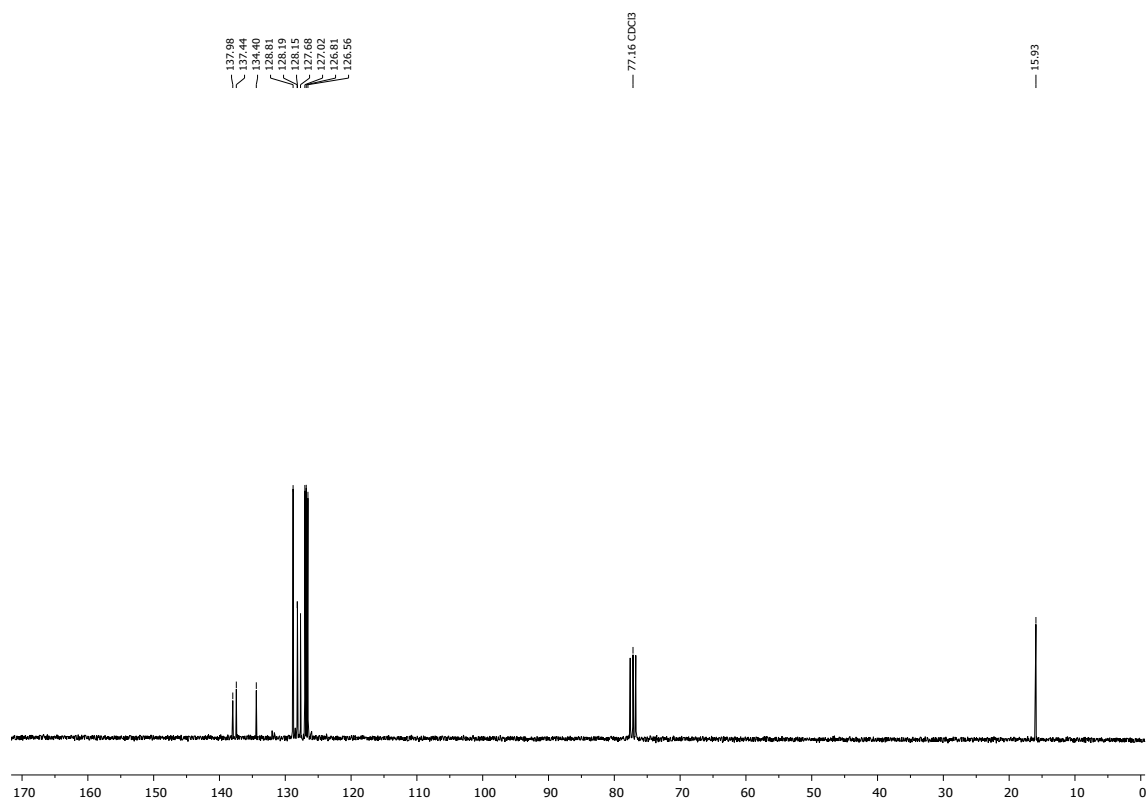

**Figure SI21.** <sup>13</sup>C NMR (75 MHz, CDCl<sub>3</sub>, 298 K) spectrum of (Z)-methyl(4-styrylphenyl)sulfane.

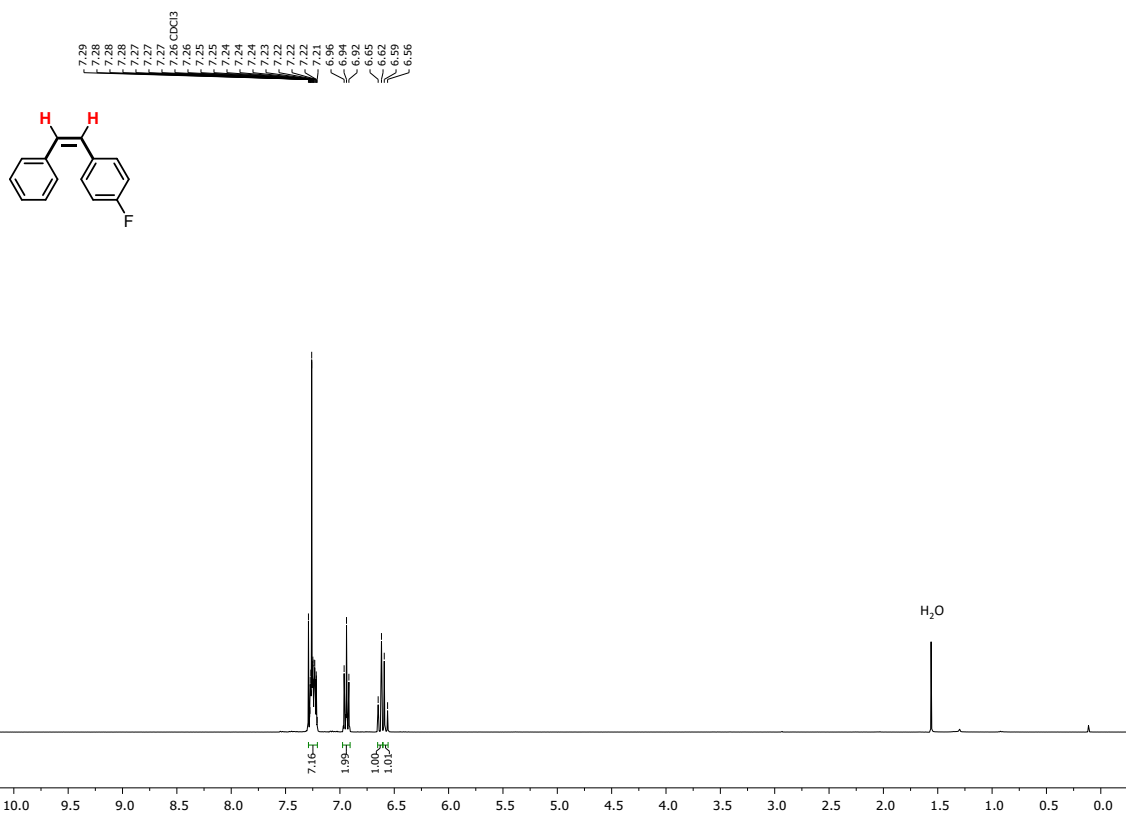

**Figure SI22.** <sup>1</sup>H NMR (400 MHz, CDCl<sub>3</sub>, 298 K) spectrum of (Z)-1-fluoro-4-styrylbenzene.

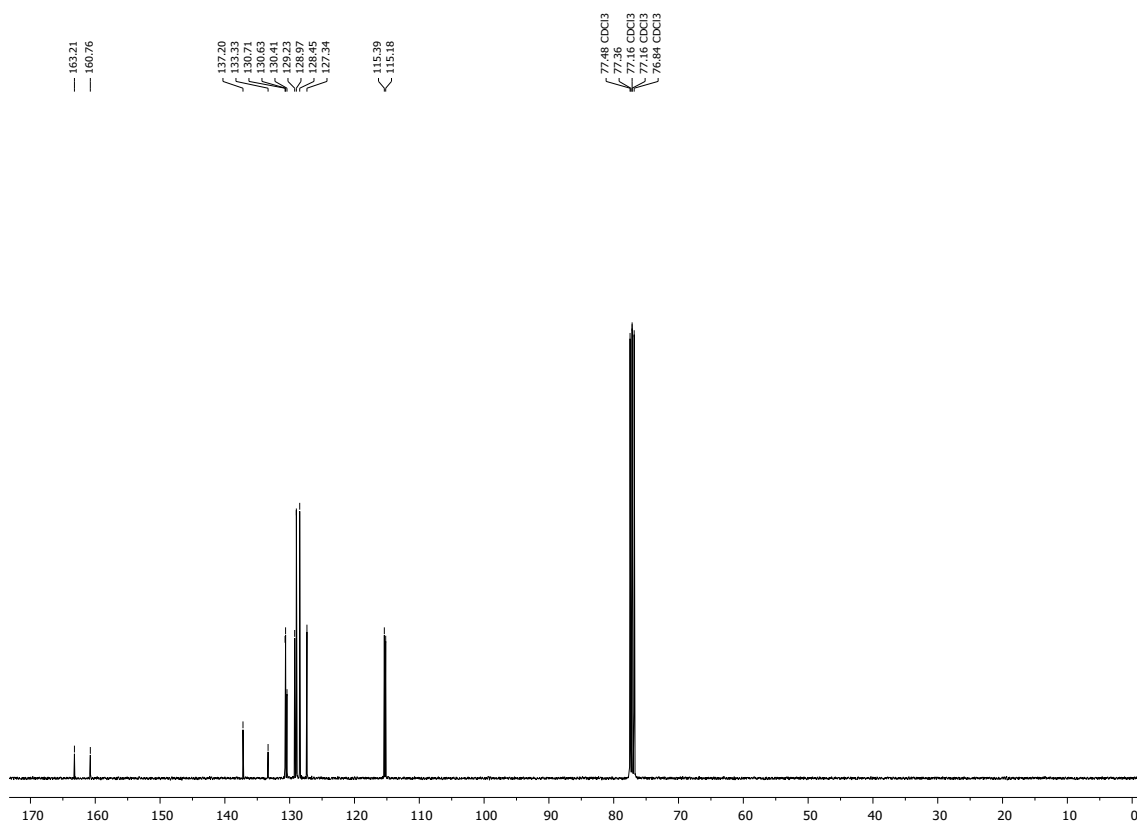

**Figure SI23.** <sup>13</sup>C NMR (101 MHz, CDCl<sub>3</sub>, 298 K) spectrum of (Z)-1-fluoro-4-styrylbenzene.

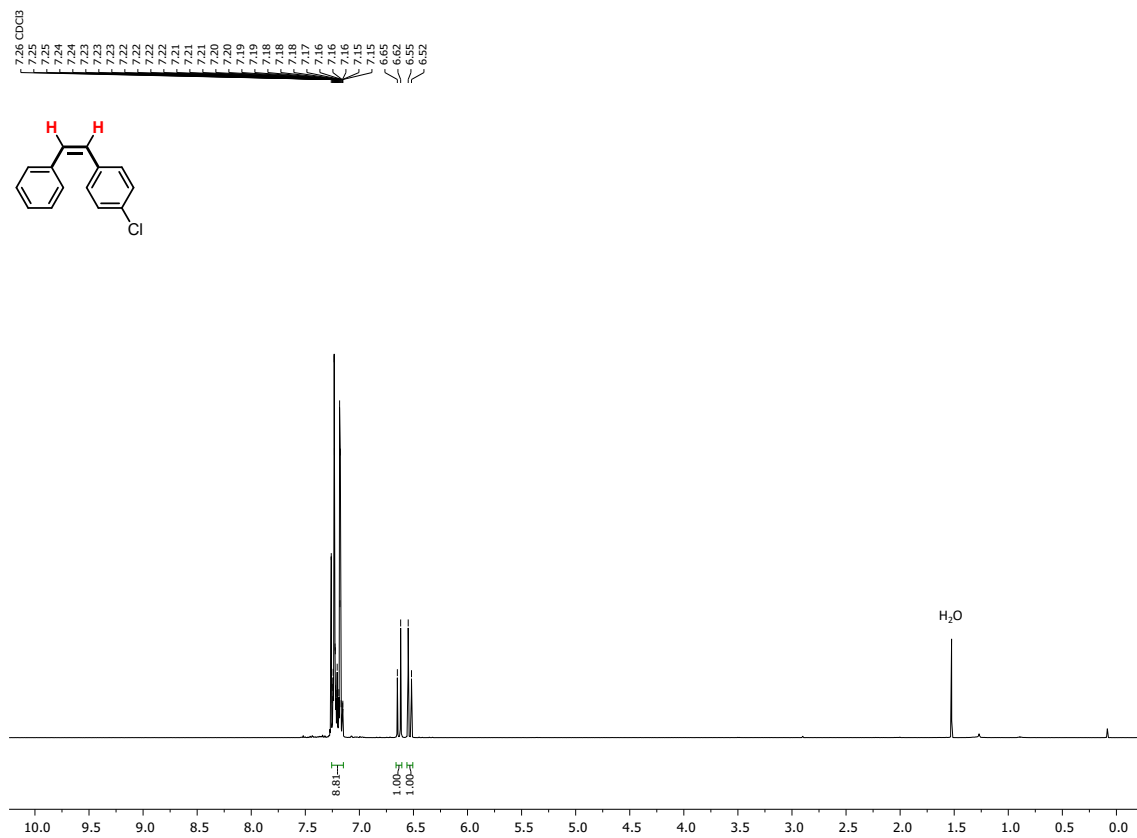

**Figure SI24.** <sup>1</sup>H NMR (400 MHz, CDCl<sub>3</sub>, 298 K) spectrum of (Z)-1-chloro-4-styrylbenzene

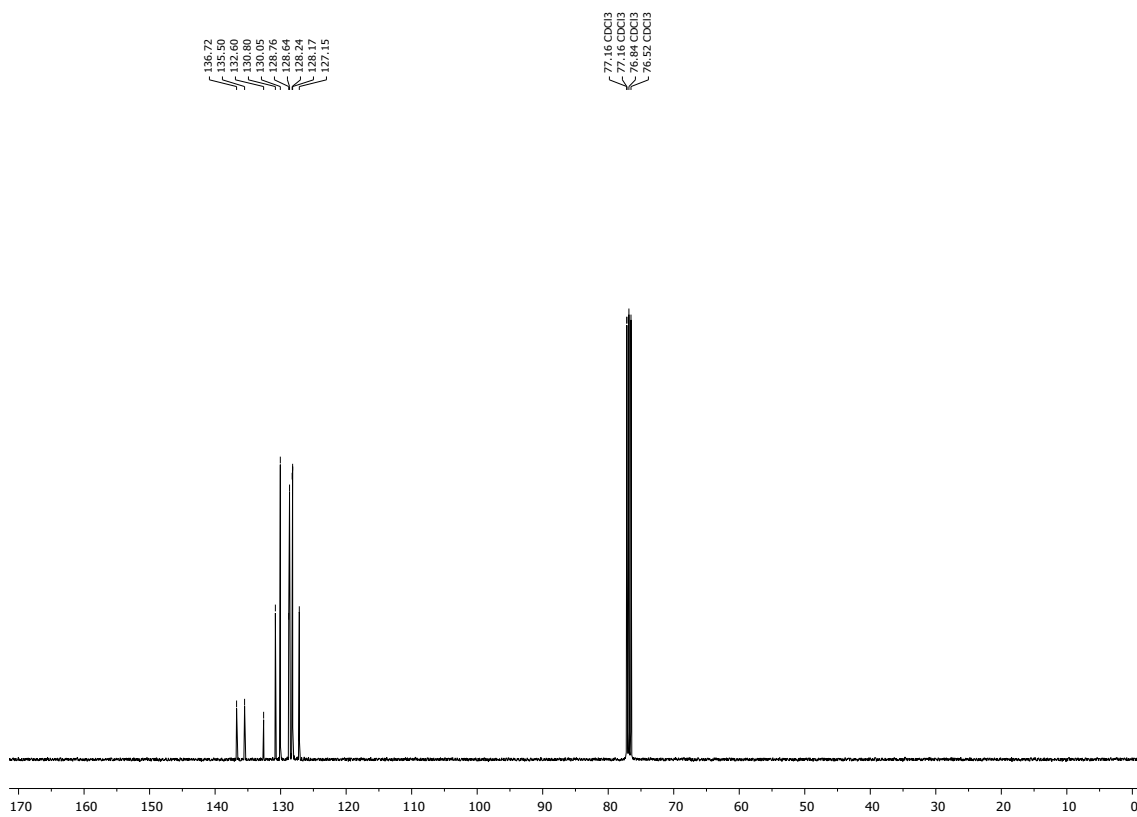

**Figure SI25.** <sup>13</sup>C NMR (101 MHz, CDCl<sub>3</sub>, 298 K) spectrum of (Z)-1-chloro-4-styrylbenzene.



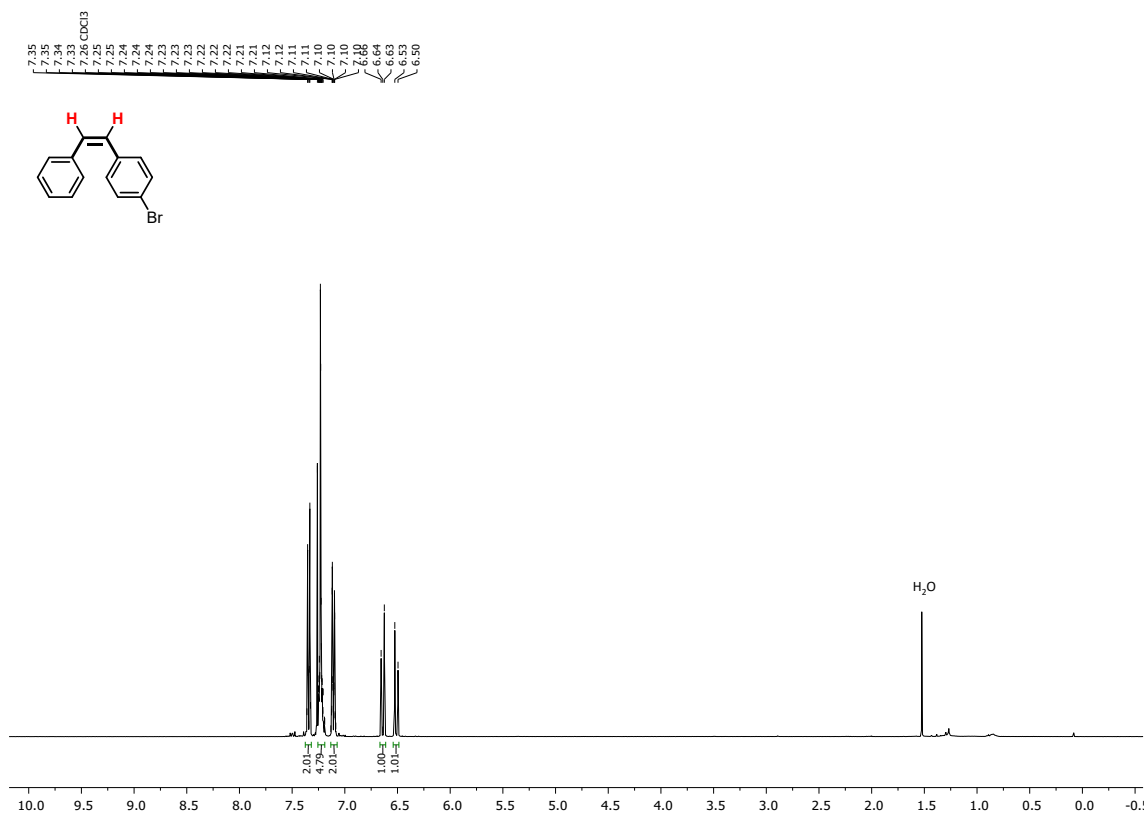

**Figure SI26.** <sup>1</sup>H NMR (400 MHz, CDCl<sub>3</sub>, 298 K) spectrum of (Z)-1-bromo-4-styrylbenzene.

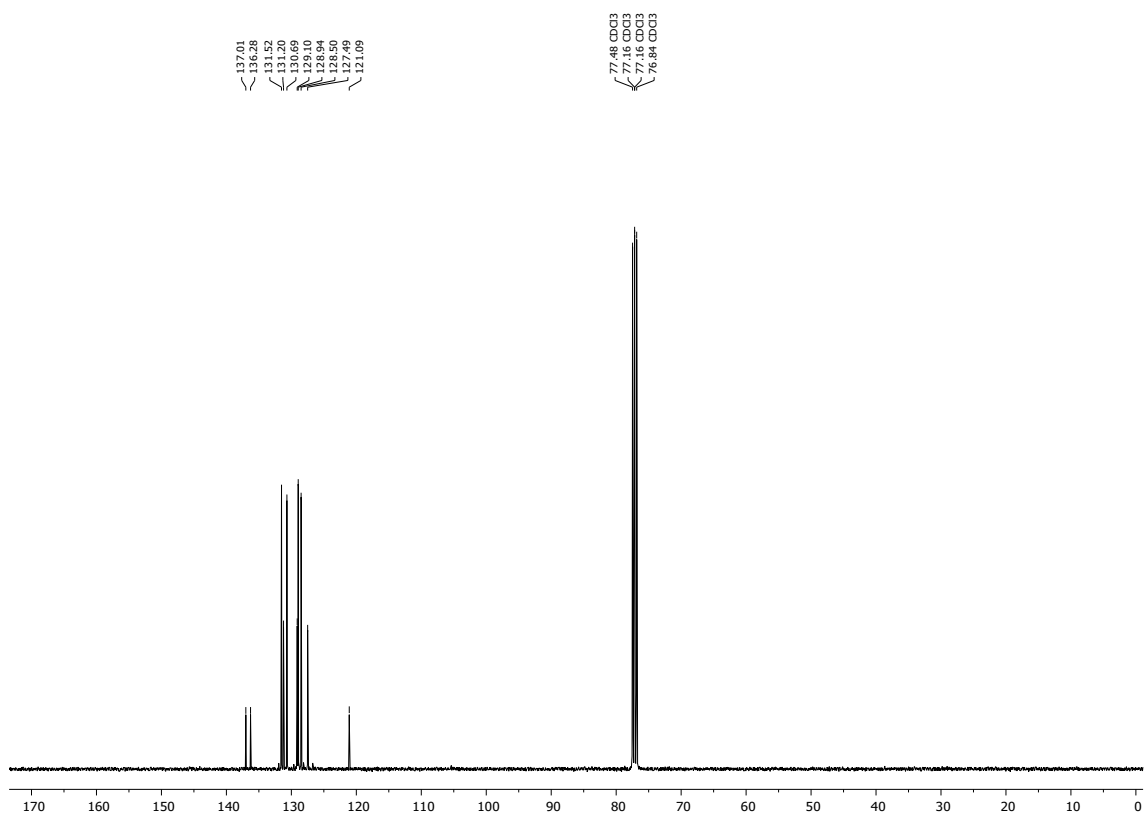

**Figure SI27.** <sup>13</sup>C NMR (101 MHz, CDCl<sub>3</sub>, 298 K) spectrum of (Z)-1-bromo-4-styrylbenzene.

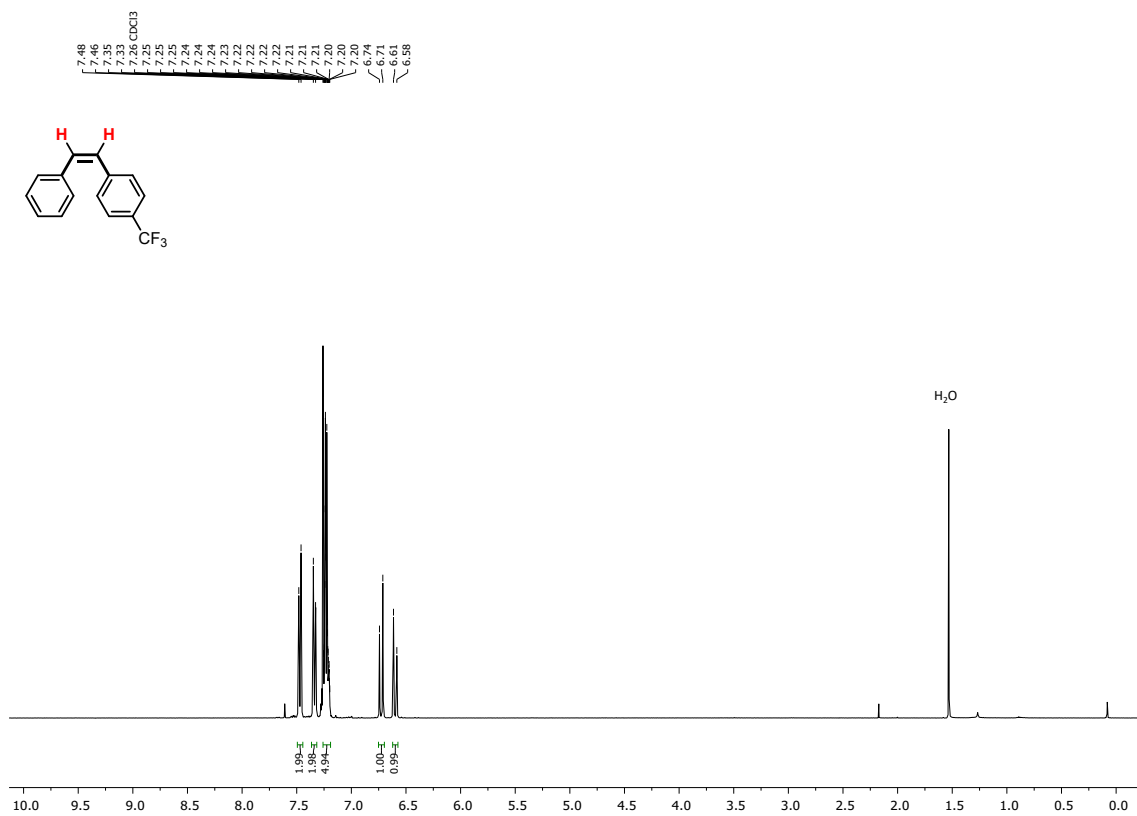

**Figure SI28.** <sup>1</sup>H NMR (400 MHz, CDCl<sub>3</sub>, 298 K) spectrum of (Z)-1-styryl-4-(trifluoromethyl)benzene.

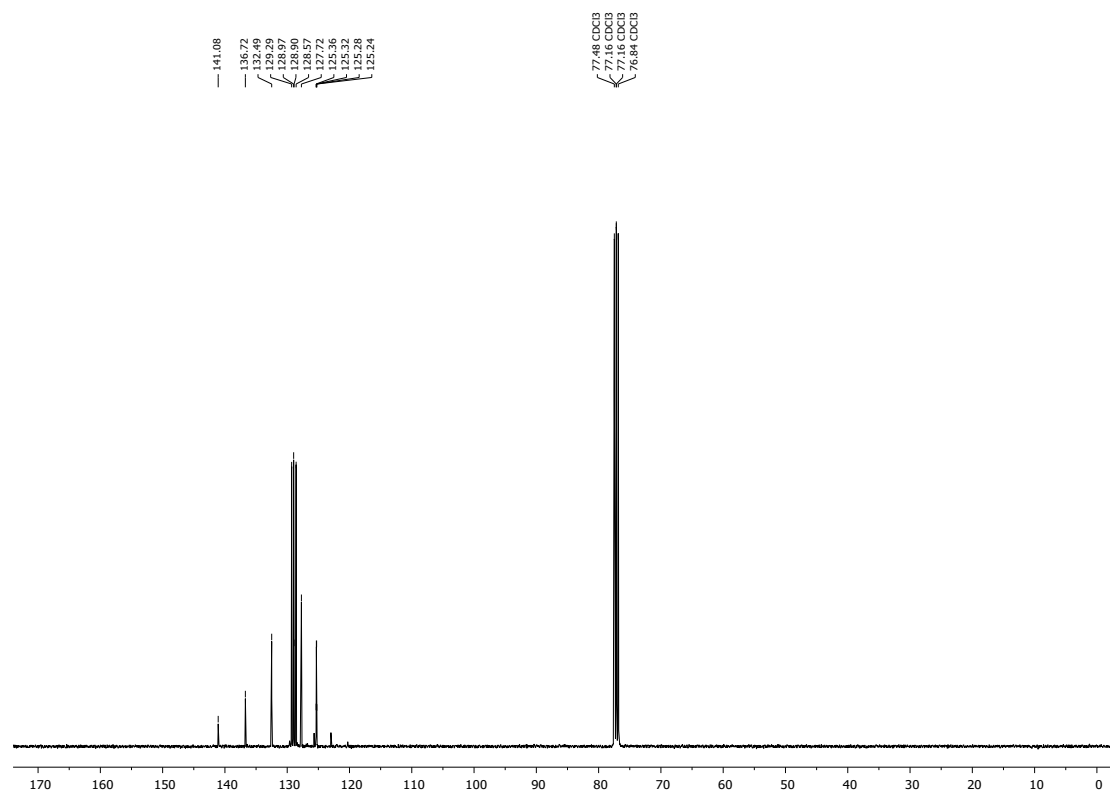

**Figure SI29.** <sup>13</sup>C NMR (101 MHz, CDCl<sub>3</sub>, 298 K) spectrum of (Z)-1-styryl-4-(trifluoromethyl)benzene.

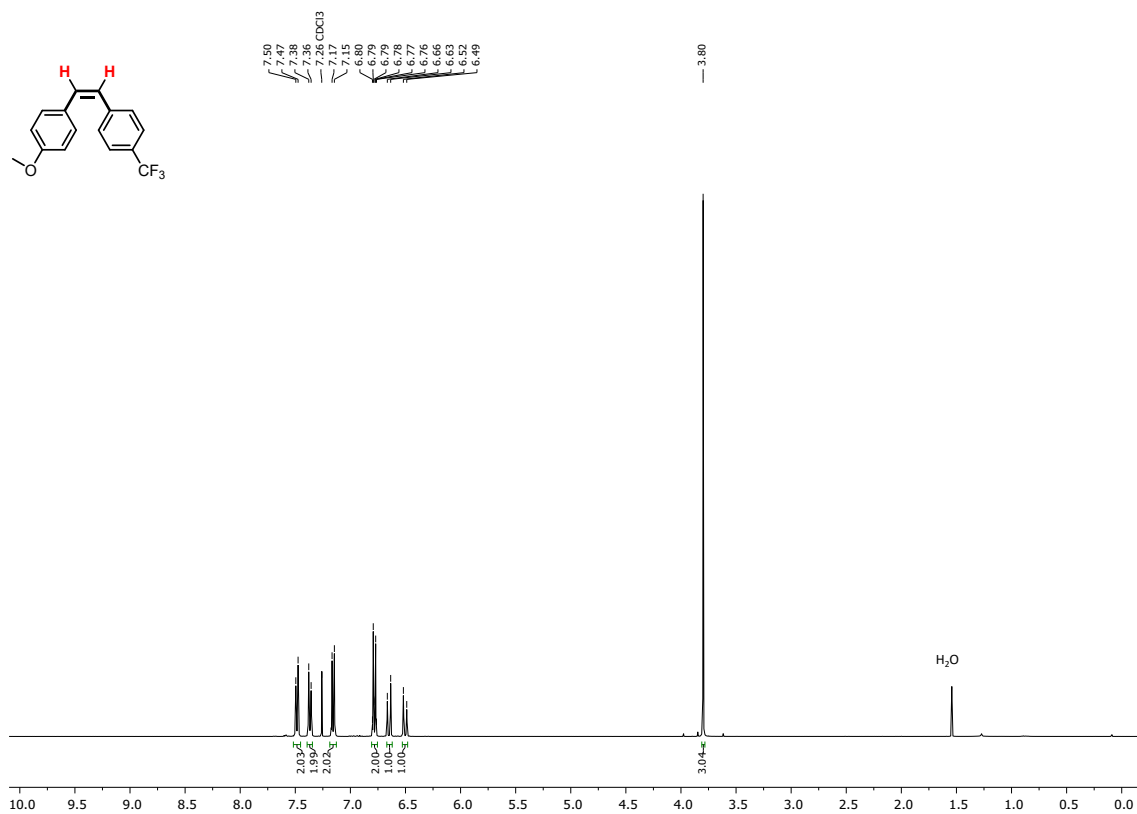

**Figure SI30.** <sup>1</sup>H NMR (400 MHz, CDCl<sub>3</sub>, 298 K) spectrum of (Z)-1-methoxy-4-(4-(trifluoromethyl)styryl)benzene.

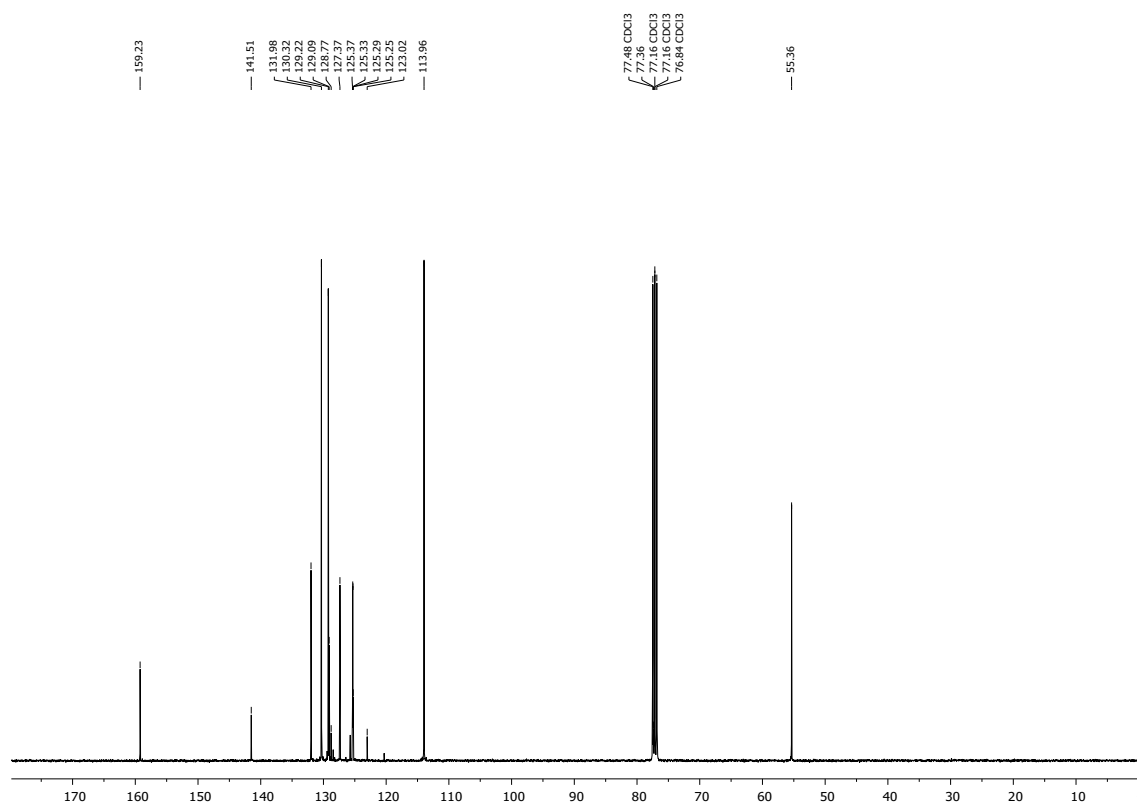

**Figure SI31.** <sup>13</sup>C NMR (101 MHz, CDCl<sub>3</sub>, 298 K) spectrum of (Z)-1-methoxy-4-(4-(trifluoromethyl)styryl)benzene.

## 8. Conditions optimization for the semihydrogenation of 3,7,11,15- tetramethylhexadec-1-yn-3-ol (**2a**) and reaction monitoring

Table SI3. Optimization of the pressure and temperature on the catalytic reduction of **1b** to **2b**.<sup>[a]</sup>

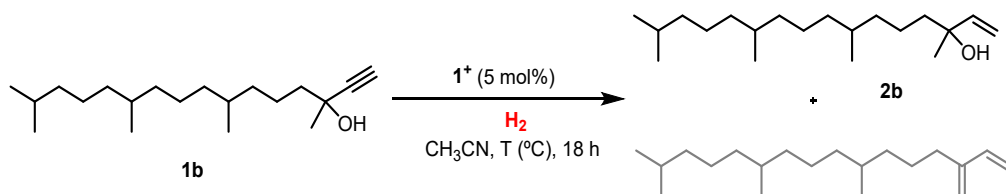

| Entry | T ( $^{\circ}C$ ) | $H_2$ (bar) | Conversion <sup>[b]</sup> (%) | Yield <b>2b</b> <sup>[b]</sup> (%) |
|-------|-------------------|-------------|-------------------------------|------------------------------------|
| 1     | 60                | 20          | n.r                           | n.r                                |
| 2     | 100               | 20          | 22                            | 22                                 |
| 3     | 120               | 20          | >99                           | 90                                 |
| 4     | 120               | 40          | >99                           | 82                                 |

<sup>[a]</sup> Reaction conditions: 3,7,11,15- tetramethylhexadec-1-yn-3-ol (0.1 mmol), catalyst (5 mol%), 18 h. <sup>[b]</sup> Determined by GC analysis using n-hexadecane as an internal standard.

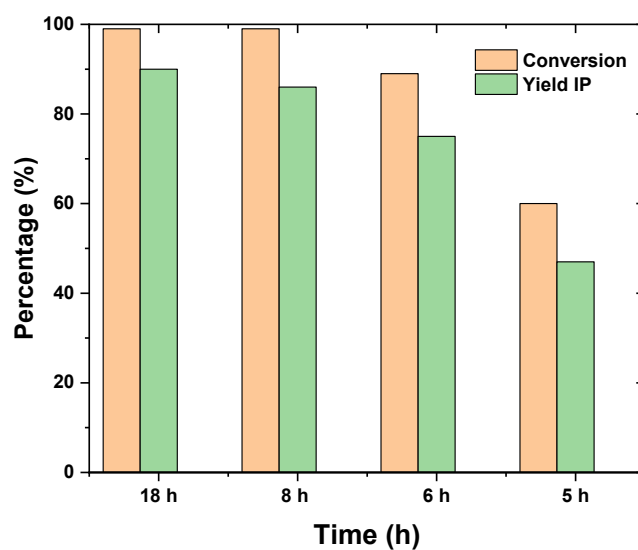

Figure SI32 Influence of the time on the catalytic reduction of **1b** to **2b**. Reaction conditions: 3,7,11,15- tetramethylhexadec-1-yn-3-ol (0.1 mmol), catalyst (5 mol%), 120  $^{\circ}C$ , 20 bar  $H_2$ , 18 h. Conversion and yield determined by GC analysis using n-hexadecane as an internal standard.

## 9. References

- [1] Huang, Z.; Wang, Y.; Leng, X.; Huang, Z. An Amine-Assisted Ionic Monohydride Mechanism Enables Selective Alkyne Cis-Semihydrogenation with Ethanol: From Elementary Steps to Catalysis. *J. Am. Chem. Soc.* **2021**, *143* (12), 4824–4836.
- [2] Armstrong, M. K.; Goodstein, M. B.; Lalic, G. Diastereodivergent Reductive Cross Coupling of Alkynes through Tandem Catalysis: Z - and E -Selective Hydroarylation of Terminal Alkynes. *J. Am. Chem. Soc.* **2018**, *140* (32), 10233–10241.
